# Supplementary material for: Exploring Autophagy in Treating Spike Protein-related Pathology
Source: Preprints.org preprint supplement (doi:10.20944/preprints202306.1903.v1), 2023-06-27
Supplement: Supplementary file 2 [file supplementary]

Supplementary Table 1: Summary of current evidence on interventions mentioned in article for treating

spike protein related diseases

| Intervention | Trial Identifier for Treating Spike Protein Related Diseases | Status | Summary of evidence for spike protein diseases  (Covid-19, long covid, vaccine injury, vaccine response) |
| --- | --- | --- | --- |
| Caffeine |  |  | N/A |
| Spermidine | NCT05421546 | RECRUITING | N/A |
| Resveratrol | NCT04400890 | TERMINATED | Lower incidence of hospitalization [1].  Reduction in death for those receiving resveratrol with copper [2]. |
| Curcumin | NCT04912921 | COMPLETED | Decrease in inflammation in Covid-19 patients [3].  Combined curcumin/piperine treatment resulted in less severe Covid-19 symptoms [4] |
|  | NCT05150782 | NOT_YET_RECRUITING |  |
|  | NCT05130671 | COMPLETED |  |
|  | NCT04603690 | COMPLETED |  |
|  | NCT05037162 | COMPLETED |  |
|  | NCT04802382 | ACTIVE_NOT_RECRUITING |  |
|  | NCT05629975 | NOT_YET_RECRUITING |  |
| EGCG |  |  | Apparent positive effect on treatment outcome, but no controls[5]. |
| Rapamycin | NCT04948203 | RECRUITING |  |
| Resveratrol | See above |  | See above |
| Fisetin | NCT04771611 | COMPLETED | Reduce coronavirus mortality in aged mice[6] |
|  | NCT04476953 | ENROLLING_BY_INVITATION |  |
|  | NCT04537299 | ENROLLING_BY_INVITATION |  |
| Nicotinamide | NCT04751604 | COMPLETED | No statistically significant difference in full blood counts, lymphocyte counts or lymphocyte improvement rate [7,8] |
|  | NCT04818216 | ACTIVE_NOT_RECRUITING |  |
|  | NCT04604704 | COMPLETED |  |
|  | NCT05175768 | RECRUITING |  |
|  | NCT04910230 | COMPLETED |  |
|  | NCT04708340 | ACTIVE_NOT_RECRUITING |  |
|  | NCT05703074 | RECRUITING |  |
|  | NCT04809974 | RECRUITING |  |
| Melatonin | NCT05596617 | COMPLETED | Improvement in recovery rate, lower risk of hospitalization and death[9] |
|  | NCT04409522 | UNKNOWN |  |
|  | NCT04353128 | COMPLETED |  |
|  | NCT04568863 | COMPLETED |  |
|  | NCT04530539 | COMPLETED |  |
|  | NCT04470297 | UNKNOWN |  |
|  | NCT05318144 | COMPLETED |  |
|  | NCT04570254 | COMPLETED |  |
|  | NCT05670444 | COMPLETED |  |
| PQQ |  |  | Improves measures in a mouse model of COPD induced endothelial damage [10] |
| Cold Exposure |  |  | N/A |
| Exercise | 517 Studies for all spike protein related diseases  61 Studies for long covid or vaccine injury | Of 61 Studies, 11 completed | Improvement in cardiorespiratory fitness in long covid[11–13] |
| Nitric Oxide | NCT04421508 | TERMINATED | Reduced viral load in Covid-19 infection[14] |
|  | NCT03331445 | TERMINATED |  |
|  | NCT04306393 | COMPLETED |  |
|  | NCT05109611 | ACTIVE_NOT_RECRUITING |  |
|  | NCT04388683 | TERMINATED |  |
|  | NCT04460183 | COMPLETED |  |
|  | NCT04606407 | COMPLETED |  |
|  | NCT05430503 | COMPLETED |  |
|  | NCT04610554 | COMPLETED |  |
|  | NCT04312243 | ACTIVE_NOT_RECRUITING |  |
|  | NCT04728919 | ACTIVE_NOT_RECRUITING |  |
|  | NCT04397692 | TERMINATED |  |
|  | NCT05715788 | RECRUITING |  |
|  | NCT04476992 | COMPLETED |  |
|  | NCT04601077 | TERMINATED |  |
|  | NCT05012319 | RECRUITING |  |
|  | NCT05599919 | COMPLETED |  |
|  | NCT04383002 | COMPLETED |  |
|  | NCT04445246 | COMPLETED |  |
|  | NCT05715762 | RECRUITING |  |
|  | NCT04337918 | COMPLETED |  |
|  | NCT04338828 | TERMINATED |  |
|  | NCT04305457 | ACTIVE_NOT_RECRUITING |  |
|  | NCT05721144 | RECRUITING |  |
| Lipoic Acid | NCT05371288 | NOT_YET_RECRUITING | Lower mortality and lower rates of organ failure in severe Covid-19 [15] |
| Acetyl L-carnitine | NCT04623619 | UNKNOWN | Shorter time to recovery when combined with l-serine (serine), NAC, NR, and l-carnitine tartrate (LCAT, the salt form of l-carnitine) [16].  Those with higher carnitine levels due to genetics had significantly lower susceptibility to Covid-19[17]. |
| Nebivolol | NCT04631536 | ACTIVE_NOT_RECRUITING | Improves dyspnoea score and capillary blood volume in long covid [18] |
|  | NCT04467931 | COMPLETED |  |
| EGCG | NCT04446065 | UNKNOWN |  |
| Quercetin | NCT04468139 | UNKNOWN | Decreased risk of intensive care unit admission and hospitalization[19] |
|  | NCT05130671 | COMPLETED |  |
|  | NCT04578158 | COMPLETED |  |
|  | NCT04603690 | COMPLETED |  |
|  | NCT04536090 | NOT_YET_RECRUITING |  |
|  | NCT04851821 | COMPLETED |  |
|  | NCT04622865 | RECRUITING |  |
|  | NCT04377789 | COMPLETED |  |
|  | NCT04844658 | COMPLETED |  |
|  | NCT05601180 | RECRUITING |  |
|  | NCT05037240 | COMPLETED |  |
|  | NCT04861298 | COMPLETED |  |
| Licorice extract | NCT04544605 | UNKNOWN | When combined with boswellic acid, significantly lowered time to recovery and mortality[20]  Multiple studies show positive effect [21,22] |
|  | NCT04553705 | COMPLETED |  |
|  | NCT05360004 | NOT_YET_RECRUITING |  |
|  | NCT04487964 | COMPLETED |  |
|  | NCT04846010 | UNKNOWN |  |
|  | NCT04790240 | UNKNOWN |  |
|  | NCT03348670 | ACTIVE_NOT_RECRUITING |  |
| cyanidin-3-glucoside | NCT05387252 | NOT_YET_RECRUITING | Suppression of inflammation from SARS-CoV-2 spike protein *in vitro* [23].  In vitro activity of a glucoside rich fruit extract (corozo) against SARS-CoV-2[24] |
|  | NCT04404218 | ACTIVE_NOT_RECRUITING |  |
| Methylene Blue | NCT05004805 | COMPLETED | Positive results on Covid-19 infection [25–27].  Patients (lacking controls) show improvement with methylene blue [27–31] |
|  | NCT04547127 | COMPLETED |  |
|  | NCT04416113 | ACTIVE_NOT_RECRUITING |  |
|  | NCT04619290 | UNKNOWN |  |
|  | NCT04635605 | ACTIVE_NOT_RECRUITING |  |
|  | NCT05003492 | NOT_YET_RECRUITING |  |
|  | NCT04370288 | UNKNOWN |  |
|  | NCT04376788 | UNKNOWN |  |
|  | NCT04933864 | COMPLETED |  |
|  | NCT05753878 | ACTIVE_NOT_RECRUITING |  |
|  | NCT04621123 | COMPLETED |  |
|  | NCT04615936 | COMPLETED |  |
| Vitamin C | 71 Studies for all spike protein related diseases  1 study for long Covid or vaccine injury |  | Decrease in severity but not statistically significant [32,33] |
| NAC | NCT04545008 | TERMINATED | Significant improvement [34,35] |
|  | NCT05258682 | NOT_YET_RECRUITING |  |
|  | NCT04570254 | COMPLETED |  |
|  | NCT04455243 | UNKNOWN |  |
|  | NCT05736887 | ACTIVE_NOT_RECRUITING |  |
|  | NCT05658549 | COMPLETED |  |
|  | NCT05220605 | COMPLETED |  |
|  | NCT04419025 | COMPLETED |  |
|  | NCT05504655 | COMPLETED |  |
|  | NCT05074121 | NOT_YET_RECRUITING |  |
|  | NCT04792021 | COMPLETED |  |
|  | NCT04928495 | UNKNOWN |  |
|  | NCT04370288 | UNKNOWN |  |
|  | NCT05371288 | NOT_YET_RECRUITING |  |
|  | NCT04374461 | ACTIVE_NOT_RECRUITING |  |
|  | NCT04666753 | COMPLETED |  |
|  | NCT04573153 | UNKNOWN |  |
|  | NCT04755972 | COMPLETED |  |
|  | NCT04900129 | COMPLETED |  |
|  | NCT04703036 | ACTIVE_NOT_RECRUITING |  |
|  | NCT04458298 | TERMINATED |  |
|  | NCT04466657 | WITHDRAWN |  |
|  | NCT04590274 | WITHDRAWN |  |
| Magnesium | NCT04716985 | ACTIVE_NOT_RECRUITING | Low magnesium associated with worse Covid-19 outcomes[36–41], including long covid[36].  Magnesium combined with Vitamin D and Vitamin B12 lessened need for oxygen support in older Covid-19 patients[42] |
|  | NCT04640168 | COMPLETED |  |
|  | NCT04973449 | COMPLETED |  |
|  | NCT05630339 | NOT_YET_RECRUITING |  |
|  | NCT04401579 | COMPLETED |  |
|  | NCT04621071 | COMPLETED |  |
|  | NCT04363606 | RECRUITING |  |
|  | NCT05226754 | RECRUITING |  |
|  | NCT05629975 | NOT_YET_RECRUITING |  |
|  | NCT04941703 | TERMINATED |  |
|  | NCT05057897 | TERMINATED |  |
|  | NCT04363216 | UNKNOWN |  |
|  | NCT05552625 | COMPLETED |  |
|  | NCT04357730 | COMPLETED |  |
|  | NCT05371288 | NOT_YET_RECRUITING |  |
|  | NCT04570462 | WITHDRAWN |  |
|  | NCT04864561 | COMPLETED |  |
|  | NCT05363410 | NOT_YET_RECRUITING |  |
|  | NCT04847518 | UNKNOWN |  |
|  | NCT05836402 | NOT_YET_RECRUITING |  |
|  | NCT05080244 | COMPLETED |  |
|  | NCT05290298 | COMPLETED |  |
|  | NCT04708340 | ACTIVE_NOT_RECRUITING |  |
|  | NCT04420676 | ACTIVE_NOT_RECRUITING |  |
|  | NCT05715944 | COMPLETED |  |
| Methylene Blue | See above |  | See above |
| PBM | NCT04418505 | UNKNOWN | PBM can reduce inflammation in animal models[43].  Improvement on pulmonary indices and faster recovery, less long covid after infection treated with PBM[44] |
|  | NCT04416113 | ACTIVE_NOT_RECRUITING |  |
|  | NCT05094726 | RECRUITING |
|  | NCT05258617 | TERMINATED |
|  | NCT04391712 | COMPLETED |
|  | NCT05760092 | RECRUITING |
|  | NCT04386694 | COMPLETED |
|  | NCT05857124 | NOT_YET_RECRUITING |
|  | NCT05430776 | RECRUITING |

1. McCreary, M.R.; Schnell, P.M.; Rhoda, D.A. Randomized Double-Blind Placebo-Controlled Proof-of-Concept Trial of Resveratrol for Outpatient Treatment of Mild Coronavirus Disease (COVID-19). *Sci Rep* **2022**, *12*, 10978, doi:10.1038/s41598-022-13920-9.

2. Mittra, I.; Souza, R. de; Bhadade, R.; Madke, T.; Shankpal, P.D.; Joshi, M.; Qayyumi, B.; Bhattacharjee, A.; Gota, V.; Gupta, S.; et al. Resveratrol and Copper for Treatment of Severe COVID-19: An Observational Study (RESCU 002) 2020, 2020.07.21.20151423.

3. Vahedian-Azimi, A.; Abbasifard, M.; Rahimi-Bashar, F.; Guest, P.C.; Majeed, M.; Mohammadi, A.; Banach, M.; Jamialahmadi, T.; Sahebkar, A. Effectiveness of Curcumin on Outcomes of Hospitalized COVID-19 Patients: A Systematic Review of Clinical Trials. *Nutrients* **2022**, *14*, 256, doi:10.3390/nu14020256.

4. Pawar, K.S.; Mastud, R.N.; Pawar, S.K.; Pawar, S.S.; Bhoite, R.R.; Bhoite, R.R.; Kulkarni, M.V.; Deshpande, A.R. Oral Curcumin With Piperine as Adjuvant Therapy for the Treatment of COVID-19: A Randomized Clinical Trial. *Frontiers in Pharmacology* **2021**, *12*.

5. Bettuzzi, S.; Gabba, L.; Cataldo, S. Efficacy of a Polyphenolic, Standardized Green Tea Extract for the Treatment of COVID-19 Syndrome: A Proof-of-Principle Study. *COVID* **2021**, *1*, 2–12, doi:10.3390/covid1010002.

6. Camell, C.D.; Yousefzadeh, M.J.; Zhu, Y.; Prata, L.G.P.L.; Huggins, M.A.; Pierson, M.; Zhang, L.; O’Kelly, R.D.; Pirtskhalava, T.; Xun, P.; et al. Senolytics Reduce Coronavirus-Related Mortality in Old Mice. *Science* **2021**, *373*, eabe4832, doi:10.1126/science.abe4832.

7. Hu, Q.; Zhang, Q.-Y.; Peng, C.-F.; Ma, Z.; Han, Y.-L. Efficiency of Nicotinamide-Based Supportive Therapy in Lymphopenia for Patients with Ordinary or Severe COVID-19: A Randomized Controlled Trial. *Medicine (Baltimore)* **2022**, *101*, e31138, doi:10.1097/MD.0000000000031138.

8. Khalaji, A.; Behnoush, A.H.; Alilou, S.; Rezaee, M.; Peiman, S.; Sahebkar, A. Adjunctive Therapy with Lipid-Lowering Agents in COVID-19: A Systematic Review and Meta-Analysis of Randomized Controlled Trials. *Lipids Health Dis* **2023**, *22*, 61, doi:10.1186/s12944-023-01828-w.

9. Lan, S.-H.; Lee, H.-Z.; Chao, C.-M.; Chang, S.-P.; Lu, L.-C.; Lai, C.-C. Efficacy of Melatonin in the Treatment of Patients with COVID-19: A Systematic Review and Meta-Analysis of Randomized Controlled Trials. *Journal of Medical Virology* **2022**, *94*, 2102–2107, doi:10.1002/jmv.27595.

10. Pattnaik, B.R.; Bhatraju, N.; Kashyap, S.; Verma, U.; Madan, K.; Guleria, R.; Agrawal, A.; Mohan, A. Effect of a Nutraceutical Drug in COPD Condition: A Pilot Study of in Vitro, in Vivo and Clinical Trial. *European Respiratory Journal* **2022**, *60*, doi:10.1183/13993003.congress-2022.1661.

11. Barbara, C.; Clavario, P.; De Marzo, V.; Lotti, R.; Guglielmi, G.; Porcile, A.; Russo, C.; Griffo, R.; Mäkikallio, T.; Hautala, A.J.; et al. Effects of Exercise Rehabilitation in Patients with Long Coronavirus Disease 2019. *European Journal of Preventive Cardiology* **2022**, *29*, e258–e260, doi:10.1093/eurjpc/zwac019.

12. Nopp, S.; Moik, F.; Klok, F.A.; Gattinger, D.; Petrovic, M.; Vonbank, K.; Koczulla, A.R.; Ay, C.; Zwick, R.H. Outpatient Pulmonary Rehabilitation in Patients with Long COVID Improves Exercise Capacity, Functional Status, Dyspnea, Fatigue, and Quality of Life. *Respiration* **2022**, *101*, 593–601, doi:10.1159/000522118.

13. Romanet, C.; Wormser, J.; Fels, A.; Lucas, P.; Prudat, C.; Sacco, E.; Bruel, C.; Plantefève, G.; Pene, F.; Chatellier, G.; et al. Effectiveness of Exercise Training on the Dyspnoea of Individuals with Long COVID: A Randomised Controlled Multicentre Trial. *Annals of Physical and Rehabilitation Medicine* **2023**, *66*, 101765, doi:10.1016/j.rehab.2023.101765.

14. Winchester, S.; John, S.; Jabbar, K.; John, I. Clinical Efficacy of Nitric Oxide Nasal Spray (NONS) for the Treatment of Mild COVID-19 Infection. *Journal of Infection* **2021**, *83*, 237–279, doi:10.1016/j.jinf.2021.05.009.

15. Zhong, M.; Sun, A.; Xiao, T.; Yao, G.; Sang, L.; Zheng, X.; Zhang, J.; Jin, X.; Xu, L.; Yang, W.; et al. A Randomized, Single-Blind, Group Sequential, Active-Controlled Study to Evaluate the Clinical Efficacy and Safety of α-Lipoic Acid for Critically Ill Patients With Coronavirus Disease 2019 (COVID-19). *Frontiers in Medicine* **2022**, *8*.

16. Altay, O.; Arif, M.; Li, X.; Yang, H.; Aydın, M.; Alkurt, G.; Kim, W.; Akyol, D.; Zhang, C.; Dinler-Doganay, G.; et al. Combined Metabolic Activators Accelerates Recovery in Mild-to-Moderate COVID-19. *Advanced Science* **2021**, *8*, 2101222, doi:10.1002/advs.202101222.

17. Li, C.; Ou, R.; Wei, Q.; Shang, H. Carnitine and COVID-19 Susceptibility and Severity: A Mendelian Randomization Study. *Frontiers in Nutrition* **2021**, *8*.

18. Negro, R.W.D.; Turco, P.; Povero, M. Nebivolol: An Effective Option against Long-Lasting Dyspnoea Following COVID-19 Pneumonia - a Pivotal Double-Blind, Cross-over Controlled Study. *Multidisciplinary Respiratory Medicine* **2022**, *17*, doi:10.4081/mrm.2022.886.

19. Cheema, H.A.; Sohail, A.; Fatima, A.; Shahid, A.; Shahzil, M.; Ur Rehman, M.E.; Awan, R.U.; Chinnam, S.; Nashwan, A.J. Quercetin for the Treatment of COVID-19 Patients: A Systematic Review and Meta-Analysis. *Reviews in Medical Virology* **2023**, *33*, e2427, doi:10.1002/rmv.2427.

20. Gomaa, A.A.; Mohamed, H.S.; Abd-ellatief, R.B.; Gomaa, M.A.; Hammam, D.S. Advancing Combination Treatment with Glycyrrhizin and Boswellic Acids for Hospitalized Patients with Moderate COVID-19 Infection: A Randomized Clinical Trial. *Inflammopharmacol* **2022**, *30*, 477–486, doi:10.1007/s10787-022-00939-7.

21. Banerjee, S.; Baidya, S.K.; Adhikari, N.; Ghosh, B.; Jha, T. Glycyrrhizin as a Promising Kryptonite against SARS-CoV-2: Clinical, Experimental, and Theoretical Evidences. *Journal of Molecular Structure* **2023**, *1275*, 134642, doi:10.1016/j.molstruc.2022.134642.

22. Gomaa, A.A.; Abdel-Wadood, Y.A.; Gomaa, M.A. Glycyrrhizin and Boswellic Acids, the Golden Nutraceuticals: Multitargeting for Treatment of Mild–Moderate COVID-19 and Prevention of Post-COVID Cognitive Impairment. *Inflammopharmacol* **2022**, *30*, 1977–1992, doi:10.1007/s10787-022-01062-3.

23. Semmarath, W.; Mapoung, S.; Umsumarng, S.; Arjsri, P.; Srisawad, K.; Thippraphan, P.; Yodkeeree, S.; Dejkriengkraikul, P. Cyanidin-3-O-Glucoside and Peonidin-3-O-Glucoside-Rich Fraction of Black Rice Germ and Bran Suppresses Inflammatory Responses from SARS-CoV-2 Spike Glycoprotein S1-Induction In Vitro in A549 Lung Cells and THP-1 Macrophages via Inhibition of the NLRP3 Inflammasome Pathway. *Nutrients* **2022**, *14*, 2738, doi:10.3390/nu14132738.

24. Jaimes-Gualdrón, T.; Flórez-Álvarez, L.; Zapata-Cardona, M.I.; Rojano, B.A.; Rugeles, M.T.; Zapata-Builes, W. Corozo (Bactris Guineensis) Fruit Extract Has Antiviral Activity in Vitro against SARS-CoV-2. *Functional Foods in Health and Disease* **2022**, *12*, 534–546.

25. Dabholkar, N.; Gorantla, S.; Dubey, S.K.; Alexander, A.; Taliyan, R.; Singhvi, G. Repurposing Methylene Blue in the Management of COVID-19: Mechanistic Aspects and Clinical Investigations. *Biomedicine & Pharmacotherapy* **2021**, *142*, 112023, doi:10.1016/j.biopha.2021.112023.

26. Hamidi-Alamdari, D.; Hafizi-Lotfabadi, S.; Bagheri-Moghaddam, A.; Safari, H.; Mozdourian, M.; Javidarabshahi, Z.; Peivandi-Yazdi, A.; Ali-Zeraati, A.; Sedaghat, A.; Poursadegh, F.; et al. Methylene Blue for Treatment of Hospitalized COVID-19 Patients: A Randomized, Controlled, Open-Label Clinical Trial, Phase 2. *Revista de investigación clínica* **2021**, *73*, 190–198, doi:10.24875/ric.21000028.

27. Patidar, V.; Sharma, A.; Bhoraskar, S.; Tripathi, A.P.; Dhaneriya, S. The Role of Nebulized Methylene Blue [NMB]

in The Management of COVID-19 Cases: An Observational Study. *International Journal of Medical Arts* **2022**, *4*, 2129–2132, doi:10.21608/ijma.2022.112347.1416.

28. Alamdari, D.H.; Moghaddam, A.B.; Amini, S.; Keramati, M.R.; Zarmehri, A.M.; Alamdari, A.H.; Damsaz, M.; Banpour, H.; Yarahmadi, A.; Koliakos, G. Application of Methylene Blue -Vitamin C –N-Acetyl Cysteine for Treatment of Critically Ill COVID-19 Patients, Report of a Phase-I Clinical Trial. *European Journal of Pharmacology* **2020**, *885*, 173494, doi:10.1016/j.ejphar.2020.173494.

29. Mahale, N.; Godavarthy, P.; Marreddy, S.; Gokhale, S.D.; Funde, P.; Rajhans, P.A.; Akole, P.V.; Pawar, B.; Bhurke, B.; Dalvi, P.; et al. Intravenous Methylene Blue as a Rescue Therapy in the Management of Refractory Hypoxia in COVID-19 ARDS Patients: A Case Series. *Indian J Crit Care Med* **2021**, *25*, 934–938, doi:10.5005/jp-journals-10071-23905.

30. Yella, S.H.T.; Yella, S.S.T.; Sasanka, K.S.B.S.K.; Thangaraju, P. Does Methylene Blue Satisfy an Option in COVID-19 ARDS. *Infectious Disorders - Drug TargetsDisorders)* **2022**, *22*, 62–65, doi:10.2174/1871526522666220317155947.

31. Henry, M.; Summa, M.; Patrick, L.; Schwartz, L. A Cohort of Cancer Patients with No Reported Cases of SARS-CoV-2 Infection: The Possible Preventive Role of Methylene Blue. *Substantia* **2020**, 888–888, doi:10.13128/Substantia-888.

32. Rawat, D.; Roy, A.; Maitra, S.; Gulati, A.; Khanna, P.; Baidya, D.K. Vitamin C and COVID-19 Treatment: A Systematic Review and Meta-Analysis of Randomized Controlled Trials. *Diabetes & Metabolic Syndrome: Clinical Research & Reviews* **2021**, *15*, 102324, doi:10.1016/j.dsx.2021.102324.

33. Hemilä, H.; de Man, A.M.E. Vitamin C and COVID-19. *Frontiers in Medicine* **2021**, *7*.

34. Assimakopoulos, S.F.; Aretha, D.; Komninos, D.; Dimitropoulou, D.; Lagadinou, M.; Leonidou, L.; Oikonomou, I.; Mouzaki, A.; Marangos, M. N-Acetyl-Cysteine Reduces the Risk for Mechanical Ventilation and Mortality in Patients with COVID-19 Pneumonia: A Two-Center Retrospective Cohort Study. *Infectious Diseases* **2021**, *53*, 847–854, doi:10.1080/23744235.2021.1945675.

35. Paraskevas, T.; Kantanis, A.; Karalis, I.; Michailides, C.; Karamouzos, V.; Koniari, I.; Pierrakos, C.; Velissaris, D. N-Acetylcysteine Efficacy in Patients Hospitalized with COVID-19 Pneumonia: A Systematic Review and Meta-Analysis. *Romanian Journal of Internal Medicine* **2023**, *61*, 41–52, doi:10.2478/rjim-2023-0001.

36. La Carrubba, A.; Veronese, N.; Di Bella, G.; Cusumano, C.; Di Prazza, A.; Ciriminna, S.; Ganci, A.; Naro, L.; Dominguez, L.J.; Barbagallo, M.; et al. Prognostic Value of Magnesium in COVID-19: Findings from the COMEPA Study. *Nutrients* **2023**, *15*, 830, doi:10.3390/nu15040830.

37. Segev, A.; Sagir, A.; Matetzky, S.; Segev, A.; Atar, S.; Shechter, M. Admission Serum Magnesium Levels Is Associated with Short and Long-Term Clinical Outcomes in COVID-19 Patients. *Nutrients* **2023**, *15*, 2016, doi:10.3390/nu15092016.

38. Pulido Perez, P.; Póndigo de los Angeles, J.A.; Perez Peralta, A.; Ramirez Mojica, E.; Torres Rasgado, E.; Hernandez-Hernandez, M.E.; Romero, J.R. Reduction in Serum Magnesium Levels and Renal Function Are Associated with Increased Mortality in Obese COVID-19 Patients. *Nutrients* **2022**, *14*, 4054, doi:10.3390/nu14194054.

39. Díez, J.J.; Iglesias, P.; García, A.; Martín-Casasempere, I.; Bernabéu-Andréu, F.A. Serum Calcium, Magnesium, and Phosphorus Levels in Patients with COVID-19: Relationships with Poor Outcome and Mortality. *Horm Metab Res* **2023**, *55*, 31–39, doi:10.1055/a-1899-8862.

40. Guerrero-Romero, F.; Mercado, M.; Rodriguez-Moran, M.; Ramírez-Renteria, C.; Martínez-Aguilar, G.; Marrero-Rodríguez, D.; Ferreira-Hermosillo, A.; Simental-Mendía, L.E.; Remba-Shapiro, I.; Gamboa-Gómez, C.I.; et al. Magnesium-to-Calcium Ratio and Mortality from COVID-19. *Nutrients* **2022**, *14*, 1686, doi:10.3390/nu14091686.

41. Tian, J.; Tang, L.; Liu, X.; Li, Y.; Chen, J.; Huang, W.; Liu, M. Populations in Low-Magnesium Areas Were Associated with Higher Risk of Infection in COVID-19’s Early Transmission: A Nationwide Retrospective Cohort Study in the United States. *Nutrients* **2022**, *14*, 909, doi:10.3390/nu14040909.

42. Tan, C.W.; Ho, L.P.; Kalimuddin, S.; Cherng, B.P.Z.; Teh, Y.E.; Thien, S.Y.; Wong, H.M.; Tern, P.J.W.; Chandran, M.; Chay, J.W.M.; et al. Cohort Study to Evaluate the Effect of Vitamin D, Magnesium, and Vitamin B12 in Combination on Progression to Severe Outcomes in Older Patients with Coronavirus (COVID-19). *Nutrition* **2020**, *79–80*, 111017, doi:10.1016/j.nut.2020.111017.

43. Nejatifard, M.; Asefi, S.; Jamali, R.; Hamblin, M.R.; Fekrazad, R. Probable Positive Effects of the Photobiomodulation as an Adjunctive Treatment in COVID-19: A Systematic Review. *Cytokine* **2021**, *137*, 155312, doi:10.1016/j.cyto.2020.155312.

44. Vetrici, M.A.; Mokmeli, S.; Bohm, A.R.; Monici, M.; Sigman, S.A. Evaluation of Adjunctive Photobiomodulation (PBMT) for COVID-19 Pneumonia via Clinical Status and Pulmonary Severity Indices in a Preliminary Trial. *J Inflamm Res* **2021**, *14*, 965–979, doi:10.2147/JIR.S301625.
